# Supplementary material for: Genomic characterisation of respiratory syncytial virus: a novel system for whole genome sequencing and full-length G and F gene sequences
Source: PubMed Central journal article supplement (PMC10831411; doi:10.2807/1560-7917.es.2023.28.49.2300637), 2023-12-07
Supplement: 23-00637_CABALLERO_Supplement.pdf [file 23-00637_CABALLERO_Supplement.pdf]

This supplementary material is hosted by *Eurosurveillance* as supporting information alongside the article “Genomic characterisation of respiratory syncytial virus: a novel system for whole genome sequencing and full-length G and F gene sequences”, on behalf of the authors, who remain responsible for the accuracy and appropriateness of the content. The same standards for ethics, copyright, attributions and permissions as for the article apply. Supplements are not edited by *Eurosurveillance* and the journal is not responsible for the maintenance of any links or email addresses provided therein.

**SM. 1.** Sequencing parameters for RSV clinical specimens in the targeted whole-genome sequencing (RSVAB WGS) method. The included a description of the subtype, Ct values obtained in the viral RT-PCR used for detection and subtyping, sequencing/assembly metrics for Illumina sequencing, and GISAID accession number. N/A: not applied, the sequencer were not uploaded to the data base due to the low viral coverage

| Seq ID                      | Subtype | Cycle threshold | Reads virus | Average depth of coverage | % genome coverage | Sequencing reagents | GISAID ID        |
|-----------------------------|---------|-----------------|-------------|---------------------------|-------------------|---------------------|------------------|
| HRSV/A/Spain/MD-224741/2022 | A       | 14,33           | 4079086     | 1905                      | 94                | NextSeq             | EPI_ISL_18463183 |
| HRSV/A/Spain/MD-224420/2022 | A       | 15,1            | 1339929     | 923                       | 93                | NextSeq             | EPI_ISL_18463185 |
| HRSV/A/Spain/MD-224512/2022 | A       | 16,8            | 6141752     | 744                       | 98                | NextSeq             | EPI_ISL_18463167 |
| HRSV/A/Spain/MD-224199/2022 | A       | 15,75           | 1479714     | 461                       | 93                | NextSeq             | EPI_ISL_18463162 |
| HRSV/A/Spain/MD-192731/2019 | A       | 16,1            | 108192      | 330                       | 93                | MiSeq               | EPI_ISL_18463188 |
| HRSV/A/Spain/MD-190041/2018 | A       | 17,08           | 3131245     | 402                       | 98                | NextSeq             | EPI_ISL_18463190 |
| HRSV/A/Spain/MD-224747/2022 | A       | 17,19           | 5671738     | 1237                      | 94                | NextSeq             | EPI_ISL_18463170 |
| HRSV/A/Spain/MD-224870/2022 | A       | 18,06           | 4013221     | 483                       | 93                | NextSeq             | EPI_ISL_18463181 |
| HRSV/A/Spain/MD-192780/2019 | A       | 20,07           | 96138       | 827                       | 92                | MiSeq               | EPI_ISL_18463177 |
| HRSV/A/Spain/MD-224532/2022 | A       | 20,44           | 3283955     | 1483                      | 93                | NextSeq             | EPI_ISL_18463184 |
| HRSV/A/Spain/MD-224979/2022 | A       | 21,1            | 4201472     | 684                       | 93                | NextSeq             | EPI_ISL_18463165 |
| HRSV/A/Spain/MD-192569/2019 | A       | 22,11           | 60661       | 235                       | 92                | MiSeq               | EPI_ISL_18463174 |
| HRSV/A/Spain/MD-192566/2019 | A       | 22,19           | 105743      | 419                       | 92                | MiSeq               | EPI_ISL_18463178 |
| HRSV/A/Spain/MD-224273/2022 | A       | 24,82           | 3830104     | 298                       | 93                | NextSeq             | EPI_ISL_18463186 |
| HRSV/A/Spain/MD-190018/2019 | A       | 25,06           | 1029584     | 416                       | 84                | NextSeq             | EPI_ISL_18463171 |
| HRSV/A/Spain/MD-192775/2019 | A       | 26,04           | 75640       | 718                       | 89                | MiSeq               | EPI_ISL_18463173 |
| HRSV/B/Spain/MD-220011/2022 | B       | 14,01           | 1576919     | 155                       | 94                | NextSeq             | EPI_ISL_18463187 |
| HRSV/B/Spain/MD-191255/2019 | B       | 15,1            | 24053       | 215                       | 97                | MiSeq               | EPI_ISL_18463189 |

|                             |   |       |         |     |    |         |                  |
|-----------------------------|---|-------|---------|-----|----|---------|------------------|
| HRSV/B/Spain/MD-190043/2018 | B | 15,31 | 1008076 | 511 | 94 | NextSeq | EPI_ISL_18463191 |
| HRSV/B/Spain/MD-220471/2022 | B | 16,39 | 897973  | 635 | 93 | NextSeq | EPI_ISL_18463172 |
| HRSV/B/Spain/MD-190037/2018 | B | 17,84 | 144557  | 722 | 91 | NextSeq | EPI_ISL_18463192 |
| HRSV/B/Spain/MD-190055/2018 | B | 18,03 | 18478   | 681 | 91 | MiSeq   | EPI_ISL_18463179 |
| HRSV/B/Spain/MD-220289/2021 | B | 19,33 | 1270851 | 525 | 93 | NextSeq | EPI_ISL_18463168 |
| HRSV/B/Spain/MD-190038/2018 | B | 20,4  | 561536  | 438 | 93 | NextSeq | EPI_ISL_18463166 |
| HRSV/B/Spain/MD-190030/2018 | B | 21,52 | 2044623 | 470 | 95 | NextSeq | EPI_ISL_18463169 |
| HRSV/B/Spain/MD-224976/2022 | B | 22,58 | 1528920 | 511 | 95 | NextSeq | EPI_ISL_18463180 |
| HRSV/B/Spain/MD-190021/2018 | B | 22,97 | 192909  | 525 | 94 | NextSeq | EPI_ISL_18463175 |
| HRSV/B/Spain/MD-223807/2022 | B | 23,2  | 334884  | 711 | 90 | NextSeq | EPI_ISL_18463176 |
| HRSV/B/Spain/MD-224877/2022 | B | 25,45 | 549725  | 414 | 94 | NextSeq | EPI_ISL_18463182 |
| HRSV/B/Spain/MD-224510/2022 | B | 26,36 | 1108906 | 100 | 95 | NextSeq | EPI_ISL_18463164 |
| HRSV/B/Spain/GA-224031/2022 | B | 27,04 | 114713  | 116 | 87 | NextSeq | EPI_ISL_18463163 |
| HRSV/B/Spain/MD-224022/2022 | B | 27,99 | 31391   | 11  | 60 | NextSeq | N/A              |
| HRSV/B/Spain/MD-224193/2022 | B | 29,1  | 83013   | 11  | 65 | NextSeq | N/A              |
| HRSV/B/Spain/MD-220013/2022 | B | 29,4  | 1234    | 5   | 40 | NextSeq | N/A              |

**SM.2.** Sequence identification, subtype, cycle threshold obtained in the characterization PCR, GISAID number of accessions using the targeted RSVGF method.

| Seq ID                      | Subtype | Cycle threshold | G and F complete | GISAID ID        |
|-----------------------------|---------|-----------------|------------------|------------------|
| HRSV/A/Spain/MD-224741/2022 | A       | 14,33           | Yes              | EPI_ISL_18463183 |
| HRSV/A/Spain/MD-224880/2022 | A       | 14,48           | Yes              | EPI_ISL_18469715 |
| HRSV/A/Spain/MD-224753/2022 | A       | 14,68           | Yes              | EPI_ISL_18469716 |
| HRSV/A/Spain/MD-224206/2022 | A       | 15,04           | Yes              | EPI_ISL_18469676 |
| HRSV/A/Spain/MD-224509/2022 | A       | 15,15           | Yes              | EPI_ISL_18469707 |
| HRSV/A/Spain/MD-224974/2022 | A       | 15,3            | Yes              | EPI_ISL_18469655 |
| HRSV/A/Spain/MD-220298/2021 | A       | 15,42           | Yes              | EPI_ISL_18469662 |
| HRSV/A/Spain/MD-221551/2022 | A       | 15,45           | Yes              | EPI_ISL_18469664 |
| HRSV/A/Spain/MD-223338/2022 | A       | 15,73           | Yes              | EPI_ISL_18469667 |
| HRSV/A/Spain/MD-224199/2022 | A       | 15,75           | Yes              | EPI_ISL_18463162 |
| HRSV/A/Spain/MD-224500/2022 | A       | 15,98           | Yes              | EPI_ISL_18469696 |
| HRSV/A/Spain/MD-224512/2022 | A       | 16,08           | Yes              | EPI_ISL_18463167 |
| HRSV/A/Spain/MD-224526/2022 | A       | 16,16           | Yes              | EPI_ISL_18469711 |
| HRSV/A/Spain/MD-224514/2022 | A       | 16,26           | Yes              | EPI_ISL_18469708 |

|                             |   |       |     |                  |
|-----------------------------|---|-------|-----|------------------|
| HRSV/A/Spain/MD-224748/2022 | A | 16,29 | Yes | EPI_ISL_18469656 |
| HRSV/A/Spain/MD-224518/2022 | A | 16,5  | Yes | EPI_ISL_18469709 |
| HRSV/A/Spain/MD-224400/2022 | A | 16,64 | Yes | EPI_ISL_18469700 |
| HRSV/A/Spain/MD-220283/2022 | A | 17,01 | Yes | EPI_ISL_18469661 |
| HRSV/A/Spain/MD-224528/2022 | A | 17,03 | Yes | EPI_ISL_18469713 |
| HRSV/A/Spain/MD-224508/2022 | A | 17,1  | Yes | EPI_ISL_18469706 |
| HRSV/A/Spain/MD-223769/2022 | A | 17,12 | Yes | EPI_ISL_18469668 |
| HRSV/A/Spain/MD-224747/2022 | A | 17,19 | Yes | EPI_ISL_18463170 |
| HRSV/A/Spain/MD-224205/2022 | A | 17,31 | Yes | EPI_ISL_18469675 |
| HRSV/A/Spain/MD-224134/2022 | A | 17,38 | Yes | EPI_ISL_18469669 |
| HRSV/A/Spain/MD-224404/2022 | A | 17,98 | Yes | EPI_ISL_18469701 |
| HRSV/A/Spain/MD-224870/2022 | A | 18,06 | Yes | EPI_ISL_18463181 |
| HRSV/A/Spain/MD-224390/2022 | A | 18,07 | Yes | EPI_ISL_18469691 |
| HRSV/A/Spain/MD-224537/2022 | A | 18,07 | Yes | EPI_ISL_18469657 |
| HRSV/A/Spain/MD-224419/2022 | A | 18,18 | Yes | EPI_ISL_18469704 |
| HRSV/A/Spain/MD-222929/2022 | A | 18,22 | Yes | EPI_ISL_18469666 |
| HRSV/A/Spain/MD-224535/2022 | A | 18,28 | Yes | EPI_ISL_18469717 |
| HRSV/A/Spain/MD-224503/2022 | A | 18,34 | Yes | EPI_ISL_18469697 |
| HRSV/A/Spain/MD-224380/2022 | A | 18,42 | Yes | EPI_ISL_18469687 |
| HRSV/A/Spain/MD-224598/2022 | A | 18,42 | Yes | EPI_ISL_18469714 |
| HRSV/A/Spain/MD-224382/2022 | A | 18,48 | Yes | EPI_ISL_18469688 |
| HRSV/A/Spain/MD-224504/2022 | A | 18,5  | Yes | EPI_ISL_18469698 |
| HRSV/A/Spain/MD-224275/2022 | A | 18,81 | Yes | EPI_ISL_18469679 |
| HRSV/A/Spain/MD-224499/2022 | A | 18,83 | Yes | EPI_ISL_18469695 |
| HRSV/A/Spain/MD-224421/2022 | A | 18,86 | Yes | EPI_ISL_18469705 |
| HRSV/A/Spain/MD-224278/2022 | A | 18,97 | Yes | EPI_ISL_18469681 |
| HRSV/A/Spain/MD-224138/2022 | A | 19,11 | Yes | EPI_ISL_18469670 |
| HRSV/A/Spain/MD-224524/2022 | A | 19,14 | Yes | EPI_ISL_18469710 |
| HRSV/A/Spain/MD-224395/2022 | A | 19,29 | Yes | EPI_ISL_18469699 |
| HRSV/A/Spain/MD-224405/2022 | A | 19,38 | Yes | EPI_ISL_18469702 |
| HRSV/A/Spain/MD-224276/2022 | A | 19,41 | Yes | EPI_ISL_18469680 |
| HRSV/A/Spain/MD-222928/2022 | A | 19,44 | Yes | EPI_ISL_18469665 |
| HRSV/A/Spain/MD-224289/2022 | A | 19,47 | Yes | EPI_ISL_18469685 |
| HRSV/A/Spain/MD-224596/2022 | A | 19,5  | Yes | EPI_ISL_18469720 |
| HRSV/A/Spain/MD-224527/2022 | A | 19,55 | Yes | EPI_ISL_18469712 |
| HRSV/A/Spain/MD-224407/2022 | A | 19,7  | Yes | EPI_ISL_18469703 |
| HRSV/A/Spain/MD-224379/2022 | A | 19,75 | Yes | EPI_ISL_18469686 |
| HRSV/A/Spain/MD-224533/2022 | A | 19,81 | Yes | EPI_ISL_18469658 |
| HRSV/A/Spain/MD-224159/2022 | A | 19,93 | Yes | EPI_ISL_18469673 |
| HRSV/A/Spain/MD-224397/2022 | A | 20,04 | Yes | EPI_ISL_18469659 |
| HRSV/A/Spain/MD-224399/2022 | A | 20,15 | Yes | EPI_ISL_18469718 |
| HRSV/A/Spain/MD-224384/2022 | A | 20,32 | Yes | EPI_ISL_18469690 |
| HRSV/A/Spain/MD-220301/2021 | A | 20,36 | Yes | EPI_ISL_18469663 |
| HRSV/A/Spain/MD-224532/2022 | A | 20,44 | Yes | EPI_ISL_18463184 |
| HRSV/A/Spain/MD-224592/2022 | A | 20,46 | Yes | EPI_ISL_18469660 |

|                             |   |       |     |                  |
|-----------------------------|---|-------|-----|------------------|
| HRSV/A/Spain/MD-224393/2022 | A | 20,61 | Yes | EPI_ISL_18469693 |
| HRSV/A/Spain/MD-224280/2022 | A | 20,75 | Yes | EPI_ISL_18469683 |
| HRSV/A/Spain/MD-224027/2022 | A | 20,77 | Yes | EPI_ISL_18469654 |
| HRSV/A/Spain/MD-224391/2022 | A | 20,87 | Yes | EPI_ISL_18469692 |
| HRSV/A/Spain/MD-224269/2022 | A | 20,88 | Yes | EPI_ISL_18469677 |
| HRSV/A/Spain/MD-224140/2022 | A | 21,08 | Yes | EPI_ISL_18469671 |
| HRSV/A/Spain/MD-224980/2022 | A | 22,05 | Yes | EPI_ISL_18469719 |
| HRSV/A/Spain/MD-224271/2022 | A | 22,13 | Yes | EPI_ISL_18469678 |
| HRSV/A/Spain/MD-224282/2022 | A | 22,24 | Yes | EPI_ISL_18469684 |
| HRSV/A/Spain/MD-224279/2022 | A | 22,36 | Yes | EPI_ISL_18469682 |
| HRSV/A/Spain/MD-224443/2022 | A | 22,72 | Yes | EPI_ISL_18469694 |
| HRSV/A/Spain/MD-224383/2022 | A | 24,03 | Yes | EPI_ISL_18469689 |
| HRSV/A/Spain/MD-224204/2022 | A | 24,65 | Yes | EPI_ISL_18469674 |
| HRSV/A/Spain/MD-224273/2022 | A | 24,82 | Yes | EPI_ISL_18463186 |
| HRSV/A/Spain/MD-224157/2022 | A | 25,13 | Yes | EPI_ISL_18469672 |
| HRSV/B/Spain/MD-220777/2022 | B | 12,22 | Yes | EPI_ISL_18470178 |
| HRSV/B/Spain/MD-220011/2021 | B | 14,01 | Yes | EPI_ISL_18470179 |
| HRSV/B/Spain/MD-224517/2022 | B | 15,2  | Yes | EPI_ISL_18470180 |
| HRSV/B/Spain/MD-220471/2022 | B | 16,39 | Yes | EPI_ISL_18463172 |
| HRSV/B/Spain/MD-224139/2022 | B | 16,45 | Yes | EPI_ISL_18470181 |
| HRSV/B/Spain/MD-224195/2022 | B | 16,58 | Yes | EPI_ISL_18470182 |
| HRSV/B/Spain/MD-224749/2022 | B | 16,59 | Yes | EPI_ISL_18470183 |
| HRSV/B/Spain/MD-224534/2022 | B | 16,96 | Yes | EPI_ISL_18470184 |
| HRSV/B/Spain/MD-223194/2022 | B | 17,02 | Yes | EPI_ISL_18470185 |
| HRSV/B/Spain/GA-220577/2021 | B | 17,19 | Yes | EPI_ISL_18474127 |
| HRSV/B/Spain/MD-224745/2022 | B | 17,26 | Yes | EPI_ISL_18470186 |
| HRSV/B/Spain/MD-224203/2022 | B | 17,41 | Yes | EPI_ISL_18470187 |
| HRSV/B/Spain/MD-224519/2022 | B | 17,41 | Yes | EPI_ISL_18470188 |
| HRSV/B/Spain/MD-224752/2022 | B | 18,54 | Yes | EPI_ISL_18470189 |
| HRSV/B/Spain/MD-224513/2022 | B | 18,97 | Yes | EPI_ISL_18470190 |
| HRSV/B/Spain/GA-220563/2021 | B | 19    | Yes | EPI_ISL_18470191 |
| HRSV/B/Spain/MD-221800/2022 | B | 19,24 | Yes | EPI_ISL_18470192 |
| HRSV/B/Spain/MD-220289/2021 | B | 19,33 | Yes | EPI_ISL_18463168 |
| HRSV/B/Spain/GA-224026/2022 | B | 19,36 | Yes | EPI_ISL_18470193 |
| HRSV/B/Spain/MD-224388/2022 | B | 19,48 | Yes | EPI_ISL_18470194 |
| HRSV/B/Spain/MD-224357/2022 | B | 20,27 | Yes | EPI_ISL_18470195 |
| HRSV/B/Spain/GA-224028/2022 | B | 20,59 | Yes | EPI_ISL_18470196 |
| HRSV/B/Spain/GA-224020/2022 | B | 20,92 | Yes | EPI_ISL_18470197 |
| HRSV/B/Spain/MD-220294/2022 | B | 21,27 | Yes | EPI_ISL_18470198 |
| HRSV/B/Spain/MD-224976/2022 | B | 22,58 | Yes | EPI_ISL_18463180 |
| HRSV/B/Spain/MD-223807/2022 | B | 23,2  | Yes | EPI_ISL_18463176 |
| HRSV/B/Spain/MD-221150/2022 | B | 24,89 | Yes | EPI_ISL_18470199 |
| HRSV/B/Spain/MD-224877/2022 | B | 25,45 | Yes | EPI_ISL_18463182 |
| HRSV/B/Spain/MD-224510/2022 | B | 26,36 | Yes | EPI_ISL_18463164 |
| HRSV/B/Spain/MD-220284/2022 | B | 26,73 | Yes | EPI_ISL_18470200 |

|                             |   |       |     |                  |
|-----------------------------|---|-------|-----|------------------|
| HRSV/B/Spain/GA-224031/2022 | B | 27,04 | Yes | EPI_ISL_18463163 |
| HRSV/B/Spain/GA-224022/2022 | B | 27,99 | Yes | EPI_ISL_18470201 |
| HRSV/B/Spain/MD-224193/2022 | B | 29,1  | Yes | EPI_ISL_18470202 |
| HRSV/B/Spain/MD-220013/2021 | B | 29,4  | Yes | EPI_ISL_18470203 |
